# Supplementary material for: An Experimental Study of Team Size and Performance on a Complex Task
Source: PubMed Central journal article supplement (PMC4833429; doi:10.1371/journal.pone.0153048), 2016-04-15
Supplement: pone.0153048.s004.pdf [file pone.0153048.s004.pdf]

## Quadratic Model Fits

As mentioned in the main text, we fit the following quadratic model for team performance as a function of team size (approximated by person-hours  $\omega_p$ ):

$$y \sim \beta_0 + \beta_1\omega_p + \beta_2\omega_p^2 + \epsilon$$

The parameters of the model for the dependent variables of  $F_1$  score, precision, and recall are given in Tables 1, 2 and 3, respectively.

Table 1: F1 Score

|                         | <i>Dependent variable:</i>  |
|-------------------------|-----------------------------|
|                         | $F_1$ score                 |
| $\beta_0$               | 0.263***<br>(0.016)         |
| $\beta_1$               | 0.726***<br>(0.113)         |
| $\beta_2$               | -0.163<br>(0.113)           |
| Observations            | 47                          |
| R <sup>2</sup>          | 0.498                       |
| Adjusted R <sup>2</sup> | 0.476                       |
| Residual Std. Error     | 0.113 (df = 44)             |
| F Statistic             | 21.857*** (df = 2; 44)      |
| <i>Note:</i>            | *p<0.1; **p<0.05; ***p<0.01 |

Table 2: Precision

|                         | <i>Dependent variable:</i>  |
|-------------------------|-----------------------------|
|                         | Precision                   |
| $\beta_0$               | 0.505***<br>(0.029)         |
| $\beta_1$               | -0.005<br>(0.197)           |
| $\beta_2$               | 0.209<br>(0.197)            |
| Observations            | 47                          |
| R <sup>2</sup>          | 0.025                       |
| Adjusted R <sup>2</sup> | -0.019                      |
| Residual Std. Error     | 0.197 (df = 44)             |
| F Statistic             | 0.563 (df = 2; 44)          |
| <i>Note:</i>            | *p<0.1; **p<0.05; ***p<0.01 |

Table 3: Recall

|                         | <i>Dependent variable:</i>  |
|-------------------------|-----------------------------|
|                         | Recall                      |
| $\beta_0$               | 0.205***<br>(0.013)         |
| $\beta_1$               | 0.870***<br>(0.092)         |
| $\beta_2$               | -0.173*<br>(0.092)          |
| Observations            | 47                          |
| R <sup>2</sup>          | 0.678                       |
| Adjusted R <sup>2</sup> | 0.663                       |
| Residual Std. Error     | 0.092 (df = 44)             |
| F Statistic             | 46.231*** (df = 2; 44)      |
| <i>Note:</i>            | *p<0.1; **p<0.05; ***p<0.01 |
